# Supplementary material for: The therapeutic HIV Env C5/gp41 vaccine candidate Vacc-C5 induces specific T cell regulation in a phase I/II clinical study
Source: BMC Infect Dis. 2017 Mar 24;17:228. doi: 10.1186/s12879-017-2316-x (PMC5366104; doi:10.1186/s12879-017-2316-x)
Supplement: Additional file 1: — Supporting data. (XLSX 16 kb) [file 12879_2017_2316_MOESM1_ESM.xlsx]

## Sheet: Data
ID	Dose	Administration	C5_AB_w1	C5_AB_w6	C5_AB_w15	C5_AB_w26	ELISPOT_w1	ELISPOT_w6	ELISPOT_w15	ELISPOT_w26	CFSEdim_w1_CD8	CFSEdim_w6_CD8	CFSEdim_w15_CD8	CFSEdim_w26_CD8	CFSEdim_w1_CD4	CFSEdim_w6_CD4	CFSEdim_w15_CD4	CFSEdim_w26_CD4	uncorrCFSEdim_w1_CD8	uncorrCFSEdim_w6_CD8	uncorrCFSEdim_w15_CD8	uncorrCFSEdim_w26_CD8	uncorrCFSEdim_w1_CD4	uncorrCFSEdim_w6_CD4	uncorrCFSEdim_w15_CD4	uncorrCFSEdim_w26_CD4	netreg_w1_CD8	netreg_w6_CD8	netreg_w15_CD8	netreg_w26_CD8	netreg_w1_CD4	netreg_w6_CD4	netreg_w15_CD4	netreg_w26_CD4
1	median	id	390	390	390	390	-10	-5	-10	-25
2	low	im	2396	2389	2518	1909	-25	30	10	135
3	low	id	4462	4286	3872	3748	0	35	810	25	-0.1	0.138	0.155	0.275	0.232	-0.478	0.176	-0.006	0.794	1.137	0.674	0.504	0.831	0.939	0.789	0.294	0.614	0.145	0.099	-0.125	0.156	0.165	0.04	0.067
4	low	im	1811	2046	2440	1589	-165	-80	5	-60	-0.092	0.03	0.105	0.202	-0.233	0.156	0.174	0.341	0.243	0.284	0.593	0.55	0.177	0.549	0.522	0.684	0.058	0.127	-0.077	2.457	0.022	-0.147	-0.078	1.08
5	low	id	1934	2489	2461	2356	185	10	5	155	-0.042	-0.076	0.038	-0.154	0.122	-0.169	0.183	-0.071	0.107	0.064	0.125	0.67	0.176	0.061	0.346	0.737	0.044	-0.009	-0.067	1.261	-0.02	0.001	-0.15	1.013
6	low	im	390	390	390	642.3	-60	-25	-20	-70	0.126		0.112	0.027	0		0.191	0.026	0.214		0.165	0.059	0.218		0.225	0.065	-0.071		-0.082	0.043	0.15		0.063	-0.024
7	low	id	390	390	390	390	-20	5	30	55
8	low	im	870.8	811.7	731	788.1	280	120	-105	-70	0.236	-0.075	-0.053	0.223	0.173	-0.223	-0.076	-0.009	0.677	0.391	0.109	0.483	0.609	0.412	0.189	0.41	0.188	0.24	0.092	-0.088	0.176	0.075	0.035	0.241
9	low	id	390	390	390	390	235	205	25	-30
10	median	im	607.3	713.3	585.7	603.4	-70	35	100
11	median	id	4894	4411	4053	4023	190	0	250
12	median	im	2181	2160	1881	1802	125	-60	505	-10
13	low	id	390	390	1915	567	395	125	220	145
14	low	im	390	390	390	390	-60	20	405	347
15	median	id	5000	4461	4712	4033	405	765	135	445
16	low	im	4310	4828	3097	2286	335	435	65	85	0.081	0.338	0.321	-0.151	0.277	0.164	-0.13	-0.359	0.708	0.884	0.485	0.121	0.653	0.755	0.116	0.159	-0.158	-0.442	-0.082	-0.009	-0.194	-0.22	0.167	0.072
17	high	im	9772	8663	8748	8197	25	-10	25	-5
18	median	im	6213	5700	5823	6024	320	305		525
19	median	id	1055	1147	773.6	888.9	30	-65	82	-50
20	median	im	458.1	444	411.2	597.4	225	35	10	245	0.265	1.69	0.094	8.775	0.009	0.63	0.359	5.836	0.612	1.978	0.638	9.068	0.359	0.758	0.736	6.252	-0.289	0.875	-0.074	10.749	-0.027	0.095	-0.199	0.019
21	low	id	390	390	390	390	45	-15	110	0
22	high	id	390	390	390	390	80	20	95	50
23	median	id	390	390	390	390	-20	10	-10	20	-0.294	0.196	0.144	0.999	0.246	-0.072	0.24	0.447	0.773	0.577	2.647	1.456	0.997	0.539	1.243	0.913	2.104	-0.217	1.469	3.185	0.164	-0.062	0.875	1.069
24	median	im	390	390	390	390	20	-5	160	0
25	median	id	390	390	390	390	5	-30	-5	-10	-0.183	-0.064	0.934	0.38	-0.131	-0.075	0.457	0.768	0.204	0.406	1.154	1.044	0.192	0.461	0.684	1.32	0.325	0.201	-0.918	-0.041	0.329	0.054	-0.362	-0.327
26	median	im	5282	4852	4285	4642	-20	-35	-5	-30
27	high	id	10600	8912	8556	8109	-13	25	65	120	-0.004	-0.111	1.161	1.06	0.025	-0.003	2.721	1.059	0.409	0.1	1.27	1.292	0.462	0.144	2.902	1.29	0.088	0.069	-0.765	2.327	0.011	0.043	-2.023	0.177
28	high	im	11800	13930	12470	10360	0	5	20	-10	0.102	0.011	0.108	0.184	0.076	0.086	0.305	0.769	0.249	0.276	0.296	0.4	0.278	0.356	0.53	0.975	-0.11	0.018	0.735	3.409	0.003	-0.066	0.159	1.307
29	high	im	8570	8044	7907	6582	75	-680	-5	-25
30	high	id	4401	5419	5293	4120	35	60	10	-15	-0.061	-0.045	-0.049	0.057	0.14	0.285	-0.036	0.693	0.293	0.321	0.448	0.555	0.434	0.679	0.418	1.115	0.068	0.031	0.146	2.585	-0.115	0.088	0.132	1.466
31	high	im	6047	6351	7060	6378	825	-5	25	-25	0.2	0.763	9.03	-0.196	0.278	0.322	1.447	-0.111	0.493	0.873	9.387	0.055	0.752	0.405	1.689	0.119	-0.122	0.227	-2.893	0.149	-0.26	-0.133	-0.105	0.159
32	high	id	532.7	491.4	482.2	499.9	285	-5	5	20
33	high	id	390	390	390	390	5	-10	-75	10
34	high	im	3280	2948	4226	3713	345	95	-275	70	-0.506	-0.019	0.608	-0.181	-0.584	-0.048	0.03	-0.14	0.234	0.214	0.995	0.638	0.282	0.222	1	0.415	-0.013	0.05	-0.542	0.222	-0.05	-0.022	-0.544	0.145
35	high	id	1946	1594	1492	1379	255	-10	10	20
36	high	im	458.4	509.6	406.8	390	620	20	85	130	-0.032	-0.014	0.109	0.037	-0.054	-0.021	0.114	0.086	0.06	0.209	0.189	0.183	0.048	0.219	0.261	0.189	0.046	0.027	0.535	0.993	0.044	0.028	0.004	0.034
